# Supplementary material for: Prevalence of anemia in diabetes mellitus in South Asia: A systematic review and meta-analysis
Source: PubMed Central journal article supplement (PMC10171606; doi:10.1371/journal.pone.0285336), 2023-05-10
Supplement: pone.0285336.s004.pdf [file pone.0285336.s004.pdf]

|                          |   |    |   |   |   |   |   |   |   |   |        |
|--------------------------|---|----|---|---|---|---|---|---|---|---|--------|
| Jayalakshmi et al., 2012 | 0 | 1  | 0 | 0 | 0 | 1 | 1 | 0 | 1 | 4 | High   |
| Joshi et al., 2015       | 0 | 0  | 0 | 0 | U | 1 | 1 | 0 | 1 | 3 | High   |
| Karoli et al., 2014      | 0 | 0  | 1 | 1 | 1 | U | U | 0 | 1 | 4 | High   |
| Shah et al., 2018        | 1 | NA | 1 | 1 | 1 | 1 | 1 | 0 | 1 | 7 | Low    |
| Manglunia et al., 2018   | 0 | 0  | 0 | 0 | U | U | U | 0 | 1 | 1 | High   |
| Mohan et al., 2010       | 0 | 0  | 1 | 1 | 0 | 1 | 1 | 0 | 1 | 5 | Medium |
| Muhammad et al., 2020    | 0 | 0  | 0 | 0 | 0 | 1 | 1 | 0 | 1 | 3 | High   |
| Panda et al., 2018       | 0 | 0  | 0 | 0 | U | U | U | 0 | 1 | 1 | High   |
| Paul et al., 2017        | 0 | 0  | 0 | 0 | 0 | U | U | 0 | 1 | 1 | High   |
| Praveen et al., 2020     | 0 | U  | 0 | 0 | 1 | 1 | 1 | 1 | 1 | 5 | High   |
| Rahman et al., 2010      | 1 | 1  | 1 | 1 | 1 | 1 | 1 | 1 | 1 | 9 | Low    |
| Rahman et al., 2012      | 1 | 1  | 1 | 1 | 1 | 1 | 1 | 1 | 1 | 9 | Low    |
| Rani et al., 2010        | 1 | 1  | 1 | 1 | 1 | 1 | 1 | 1 | 1 | 9 | Low    |
| Rathod et al., 2016      | 0 | U  | 0 | 0 | U | 1 | 1 | 0 | 1 | 3 | High   |

|                           |   |   |   |   |    |   |   |   |   |   |        |
|---------------------------|---|---|---|---|----|---|---|---|---|---|--------|
| Rathod et al., 2018       | 0 | U | 0 | 0 | 0  | U | U | 0 | 1 | 1 | High   |
| Reddy et al., 2021        | 0 | 1 | 0 | 1 | 0  | 1 | U | 1 | 1 | 5 | Medium |
| Reddy et al., 2019        | 0 | 0 | 0 | 0 | U  | 1 | 0 | 0 | 1 | 1 | High   |
| Sajid et al., 2020        | 0 | 1 | 0 | 0 | 1  | 1 | 1 | 1 | 1 | 6 | Medium |
| Newtonraj et al., 2019    | 1 | 1 | 1 | 1 | 1  | 1 | 1 | 1 | 1 | 9 | Low    |
| Shabeeb et al., 2021      | 0 | 0 | 0 | 0 | U  | 0 | 0 | 0 | 1 | 1 | High   |
| Shams et al., 2015        | 0 | 1 | 0 | 1 | U  | 1 | 1 | 1 | 1 | 6 | Medium |
| Sharif et al., 2014       | 0 | 0 | 0 | 0 | U  | 1 | U | 0 | 1 | 2 | High   |
| Srinivas et al., 2014     | 0 | 0 | 0 | 0 | NA | 0 | U | 0 | 1 | 1 | High   |
| Sruthi et al., 2021       | 0 | 0 | 0 | 0 | U  | 1 | 1 | 0 | 1 | 3 | High   |
| Swarnkar et al., 2015     | 0 | 0 | 0 | 0 | 0  | 1 | 1 | 0 | 1 | 3 | High   |
| Umeshchandra et al., 2021 | 0 | 0 | 0 | 0 | 0  | 0 | 0 | 0 | 1 | 1 | High   |
| Valarmathil et al., 2018  | 0 | 0 | 0 | 0 | 0  | 0 | 0 | 0 | 1 | 1 | High   |
| Wali et al., 2022         | 0 | 0 | 0 | 0 | U  | 1 | 1 | 0 | 1 | 3 | High   |

U = Unclear, NA = Not applicable
