# Supplementary material for: Prevalence of anemia in diabetes mellitus in South Asia: A systematic review and meta-analysis
Source: PubMed Central journal article supplement (PMC10171606; doi:10.1371/journal.pone.0285336), 2023-05-10
Supplement: pone.0285336.s005.pdf [file pone.0285336.s005.pdf]

**S2 Table: Meta-regression of study-characteristics associated with heterogeneity.**

| <b>Variables</b> | <b>Coefficient</b> | <b>p-value</b> |
|------------------|--------------------|----------------|
| Country          | 0.102              | 0.156          |
| Mean age         | 0.008              | 0.002          |
| Sample size      | -0.05              | 0.439          |
| Type of DM       | 0.077              | 0.281          |
| Study design     | -0.003             | 0.970          |
| Study settings   | -0.053             | 0.720          |
| Risk of bias     | -0.044             | 0.332          |
