# Supplementary material for: Prevalence of anemia in diabetes mellitus in South Asia: A systematic review and meta-analysis
Source: PubMed Central journal article supplement (PMC10171606; doi:10.1371/journal.pone.0285336), 2023-05-10
Supplement: pone.0285336.s006.pdf [file pone.0285336.s006.pdf]

**Search strategies in selected databases**

**Detail search strategy in Medline:**

| Name of database | Keywords were searched in Medical Subject Headings (MeSH) and title and abstract |
|------------------|----------------------------------------------------------------------------------|
| Medline          | 1. "Anemia"                                                                      |
|                  | 2. "Anaemia"                                                                     |
|                  | 3. "hematological parameters"                                                    |
|                  | 4. "red blood cell parameters"                                                   |
|                  | 5. 1 OR 2 OR 3 OR 4                                                              |
|                  | 6. "Diabetes Mellitus"                                                           |
|                  | 7. "Diabetic"                                                                    |
|                  | 8. "Diabetic patient"                                                            |
|                  | 9. "Glucose tolerance test"                                                      |
|                  | 10. "Glucose intolerance"                                                        |
|                  | 11. "Hyperglycemia"                                                              |
|                  | 12. "Blood glucose"                                                              |
|                  | 13. "Gestational Diabetes"                                                       |
|                  | 14. "Impaired glucose tolerance"                                                 |
|                  | 15. "Diabetes*"                                                                  |
|                  | 16. 6 OR 7 OR 8 OR 9 OR 10 OR 11 OR 12 OR 13 OR 14 OR 15                         |
|                  | 17. "Prevalence"                                                                 |
|                  | 18. "Prevalence*"                                                                |
|                  | 19. "Incidence"                                                                  |
|                  | 20. "associated factors"                                                         |
|                  | 21. "Determinant factors"                                                        |
|                  | 22. "Determina*"                                                                 |
|                  | 23. "Epidemiology"                                                               |
|                  | 24. "Epidemiology*"                                                              |
|                  | 25. "Disease burden"                                                             |
|                  | 26. "Frequency*"                                                                 |
|                  | 27. "Magnitude"                                                                  |
|                  | 28. 17 OR 18 OR 19 OR 20 OR 21 OR 22 OR 23 OR 24 OR 25 OR 26 OR 27               |
|                  | 29. "Afghan*"                                                                    |
|                  | 30. "Bangladesh*"                                                                |
|                  | 31. "Bhutan*"                                                                    |
|                  | 32. "India*"                                                                     |
|                  | 33. "Maldiv*"                                                                    |
|                  | 34. "Nepal*"                                                                     |
|                  | 35. "Pakistan*"                                                                  |
|                  | 36. "Sri Lanka*"                                                                 |
|                  | 37. "South Asia"                                                                 |
|                  | 38. 29 OR 30 OR 31 OR 32 OR 33 OR 34 OR 35 OR 36 OR 37                           |
|                  | 39. 5 AND 16 AND 28 AND 38                                                       |

**Detail search strategy in remaining four databases:**

| Name of database                                                             | Keywords were searched for retrieving literature                   |
|------------------------------------------------------------------------------|--------------------------------------------------------------------|
| APA PsycInfo,<br>Academic Search<br>Ultimate, CINAHL,<br>and Web of Sciences | 1. "Anemia"                                                        |
|                                                                              | 2. "Anaemia"                                                       |
|                                                                              | 3. "hematological parameters"                                      |
|                                                                              | 4. "red blood cell parameters"                                     |
|                                                                              | 5. 1 OR 2 OR 3 OR 4                                                |
|                                                                              | 6. "Diabetes Mellitus"                                             |
|                                                                              | 7. "Diabetic"                                                      |
|                                                                              | 8. "Diabetic patient"                                              |
|                                                                              | 9. "Glucose tolerance test"                                        |
|                                                                              | 10. "Glucose intolerance"                                          |
|                                                                              | 11. "Hyperglycemia"                                                |
|                                                                              | 12. "Blood glucose"                                                |
|                                                                              | 13. "Gestational Diabetes"                                         |
|                                                                              | 14. "Impaired glucose tolerance"                                   |
|                                                                              | 15. "Diabetes*"                                                    |
|                                                                              | 16. 6 OR 7 OR 8 OR 9 OR 10 OR 11 OR 12 OR 13 OR 14 OR 15           |
|                                                                              | 17. "Prevalence"                                                   |
|                                                                              | 18. "Prevalence*"                                                  |
|                                                                              | 19. "Incidence"                                                    |
|                                                                              | 20. "associated factors"                                           |
|                                                                              | 21. "Determinant factors"                                          |
|                                                                              | 22. "Determina*"                                                   |
|                                                                              | 23. "Epidemiology"                                                 |
|                                                                              | 24. "Epidemiology*"                                                |
|                                                                              | 25. "Disease burden"                                               |
|                                                                              | 26. "Frequency*"                                                   |
|                                                                              | 27. "Magnitude"                                                    |
|                                                                              | 28. 17 OR 18 OR 19 OR 20 OR 21 OR 22 OR 23 OR 24 OR 25 OR 26 OR 27 |
|                                                                              | 29. "Afghan*"                                                      |
|                                                                              | 30. "Bangladesh*"                                                  |
|                                                                              | 31. "Bhutan*"                                                      |
|                                                                              | 32. "India*"                                                       |
|                                                                              | 33. "Maldiv*"                                                      |
|                                                                              | 34. "Nepal*"                                                       |
|                                                                              | 35. "Pakistan*"                                                    |
|                                                                              | 36. "Sri Lanka*"                                                   |
|                                                                              | 37. "South Asia"                                                   |
|                                                                              | 38. 29 OR 30 OR 31 OR 32 OR 33 OR 34 OR 35 OR 36 OR 37             |
|                                                                              | 39. 5 AND 16 AND 28 AND 38                                         |
